# Supplementary material for: Screening, molecular identification, and evaluation of the nutrient mobilization potential of Fluoride Resistant Bacterial isolates from fluoride-rich rice field: A case from West Bengal, India
Source: Research Square preprint supplement (doi:10.21203/rs.3.rs-5978797/v1), 2025-02-13
Supplement: Supplementary file 1 [file 5c7eff74a189c7b4bdde058b.docx]

**Supplementary Table 1. Physico-chemical properties of the fluoride contaminated soil samples**

| **Soil Parameter** | ***Jhalda*-1(Jh1)** | ***Joypur*(Joy)** | ***Arsha*(Ar)** |
| --- | --- | --- | --- |
| Soil Order | Alfisol | Alfisol | Alfisol |
| Soil Texture | Sandy loam | Sandy clay loam | Sandy- clay loam |
| pH | 4.77 ± 0.14 | 4.84 ± 0.28 | 5.61± 0.16 |
| CEC (cmol(p+)/kg soil) | 8.12 ± 0.33 | 10.25 ± 0.25 | 9.57 ± 0.32 |
| EC (dS/m) | 0.058 ± 0.007 | 0.031 ± 0.005 | 0.076 ± 0.013 |
| Organic Carbon (%) | 1.36 ± 0.05 | 2.04 ± .042 | 1.68 ± 0.09 |
| Available N (kg/ha) | 167.63 ± 3.37 | 151.7 ± 4.65 | 162.58 ± 5.8 |
| Available P (kg/ha) | 13.18 ± 0.39 | 11.48 ± 0.3 | 9.72 ± 0.3 |
| Available K(kg/ha) | 171.41 ± 3.38 | 188.33 ± 4.08 | 162.27 ± 3.66 |
| Available Zn (mg/kg) | 2.26 ± 0.08 | 1.96 ± 0.07 | 2.14 ± 0.2 |
| Available F (mg/kg) | 2.31 ± 0.05 | 2.97± 0.03 | 1.57± 0.02 |
| Total fluoride (mg/kg) | 147.32±1.87 | 282.9 ± 4.9 | 58.76± 0.76 |
